# Supplementary material
Source: ML conference proceedings conference paper supplement (https://aclanthology.org/2020.findings-emnlp.24)

# Natural Language Inference Hotflip

Frequency

0.4  
0.3  
0.2  
0.1  
0

Number of flips needed to change prediction

Mean Flips  
Combined  
Original

2.8  
3.9

0 5 10 15 20

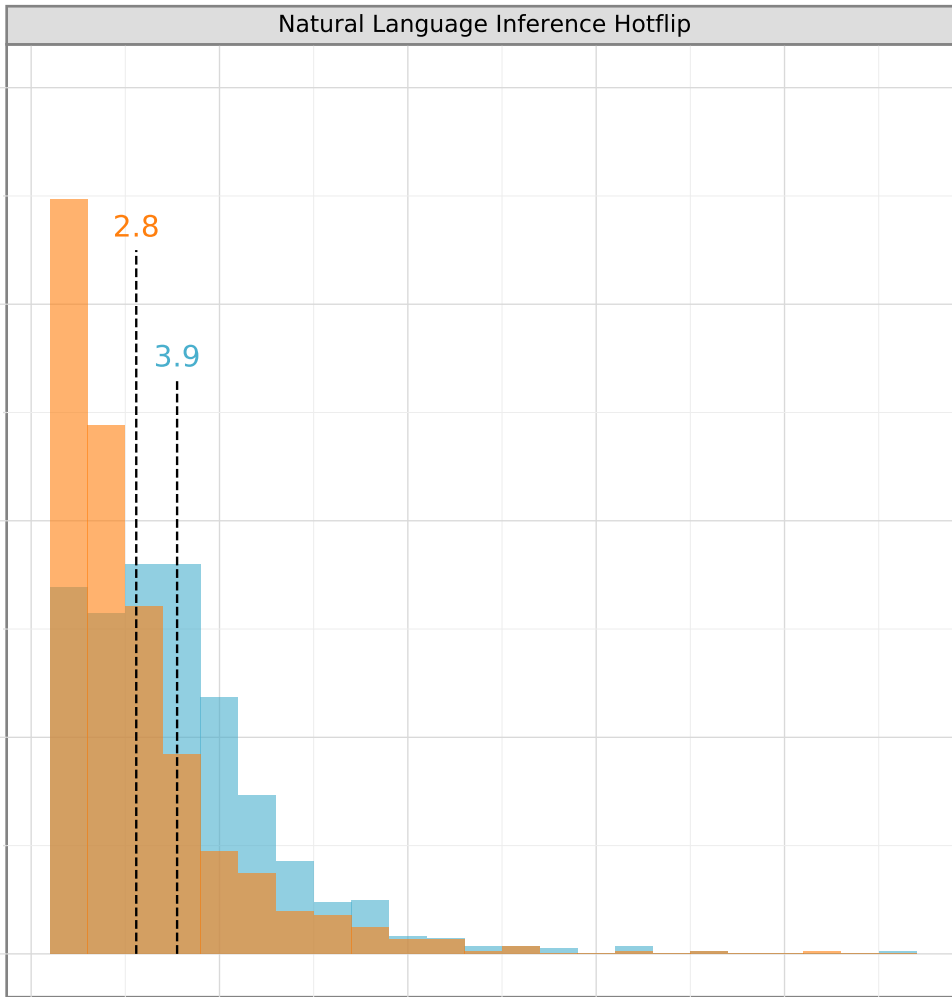

Supplement: OptionalSupplementaryMaterial [file 2020.findings-emnlp.24.OptionalSupplementaryMaterial.zip]
