# Supplementary material
Source: ML conference proceedings conference paper supplement (https://aclanthology.org/2020.findings-emnlp.24)

SST

Frequency

0.3

0.2

0.1

0

2.9

6.6

Mean Flips

Merged

Original

0

5

10

15

Number of Flips to Change Prediction

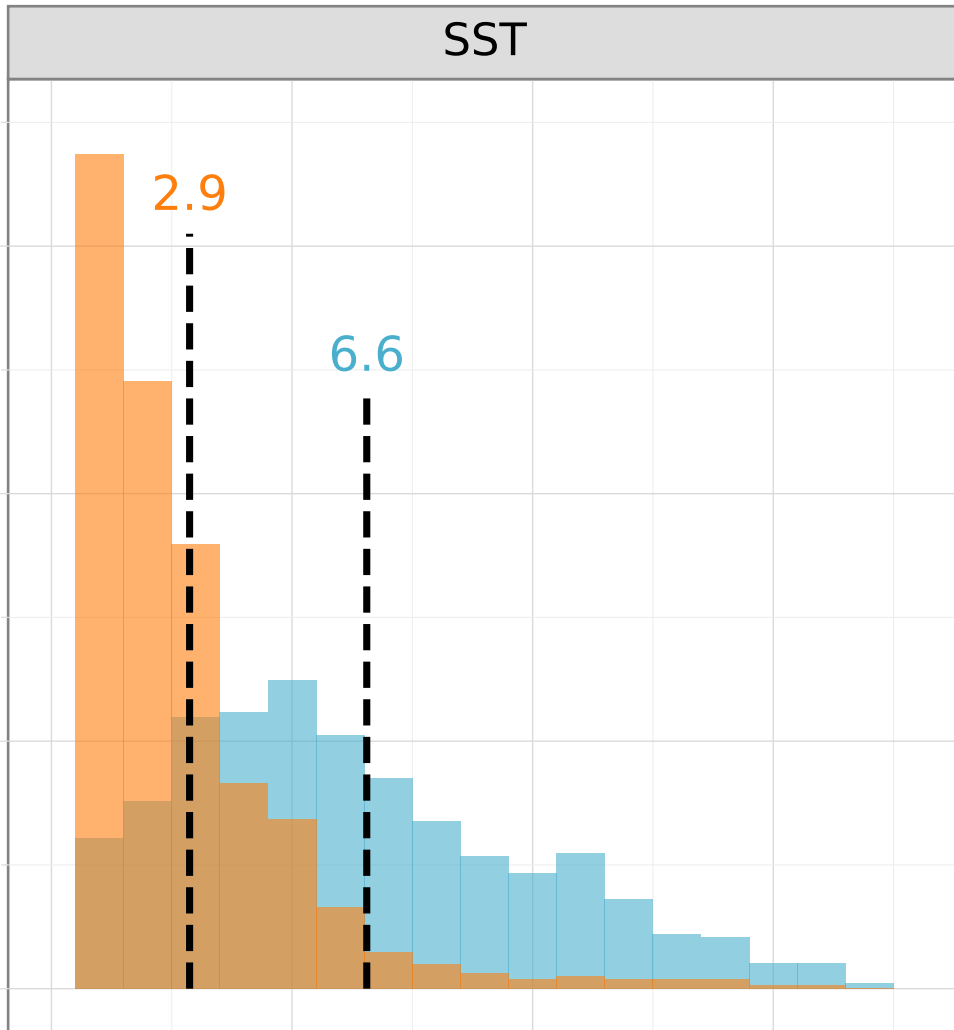

Supplement: OptionalSupplementaryMaterial [file 2020.findings-emnlp.24.OptionalSupplementaryMaterial.zip]

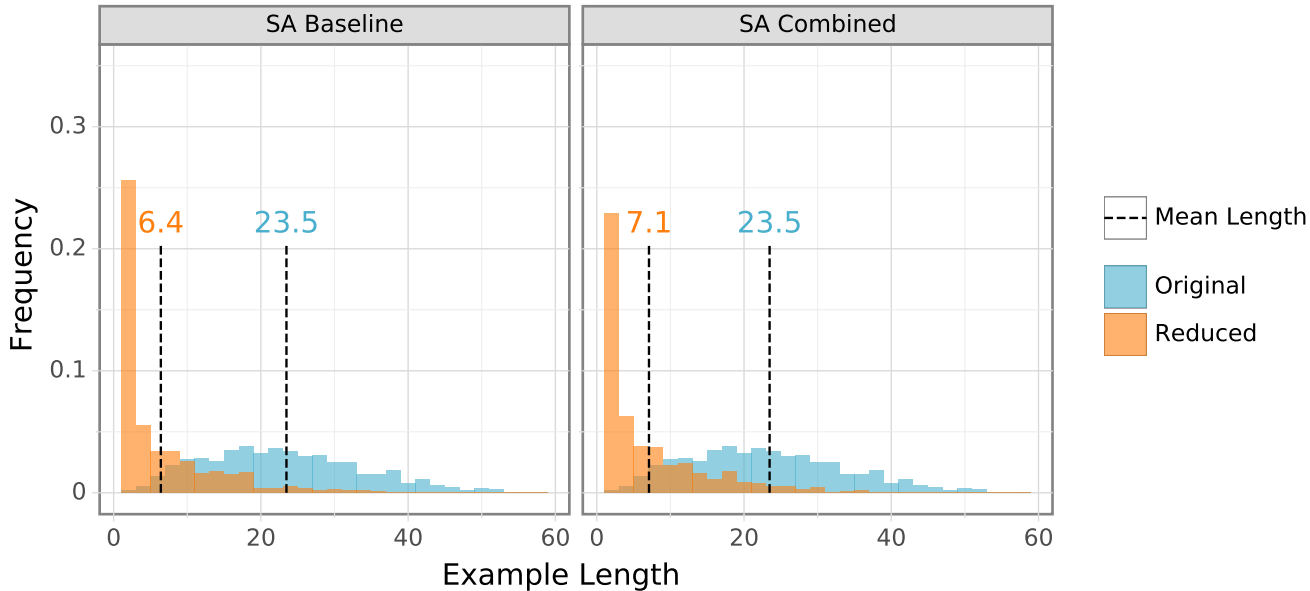

Supplement: OptionalSupplementaryMaterial [file 2020.findings-emnlp.24.OptionalSupplementaryMaterial.zip]

Natural Language Inference Hotflip

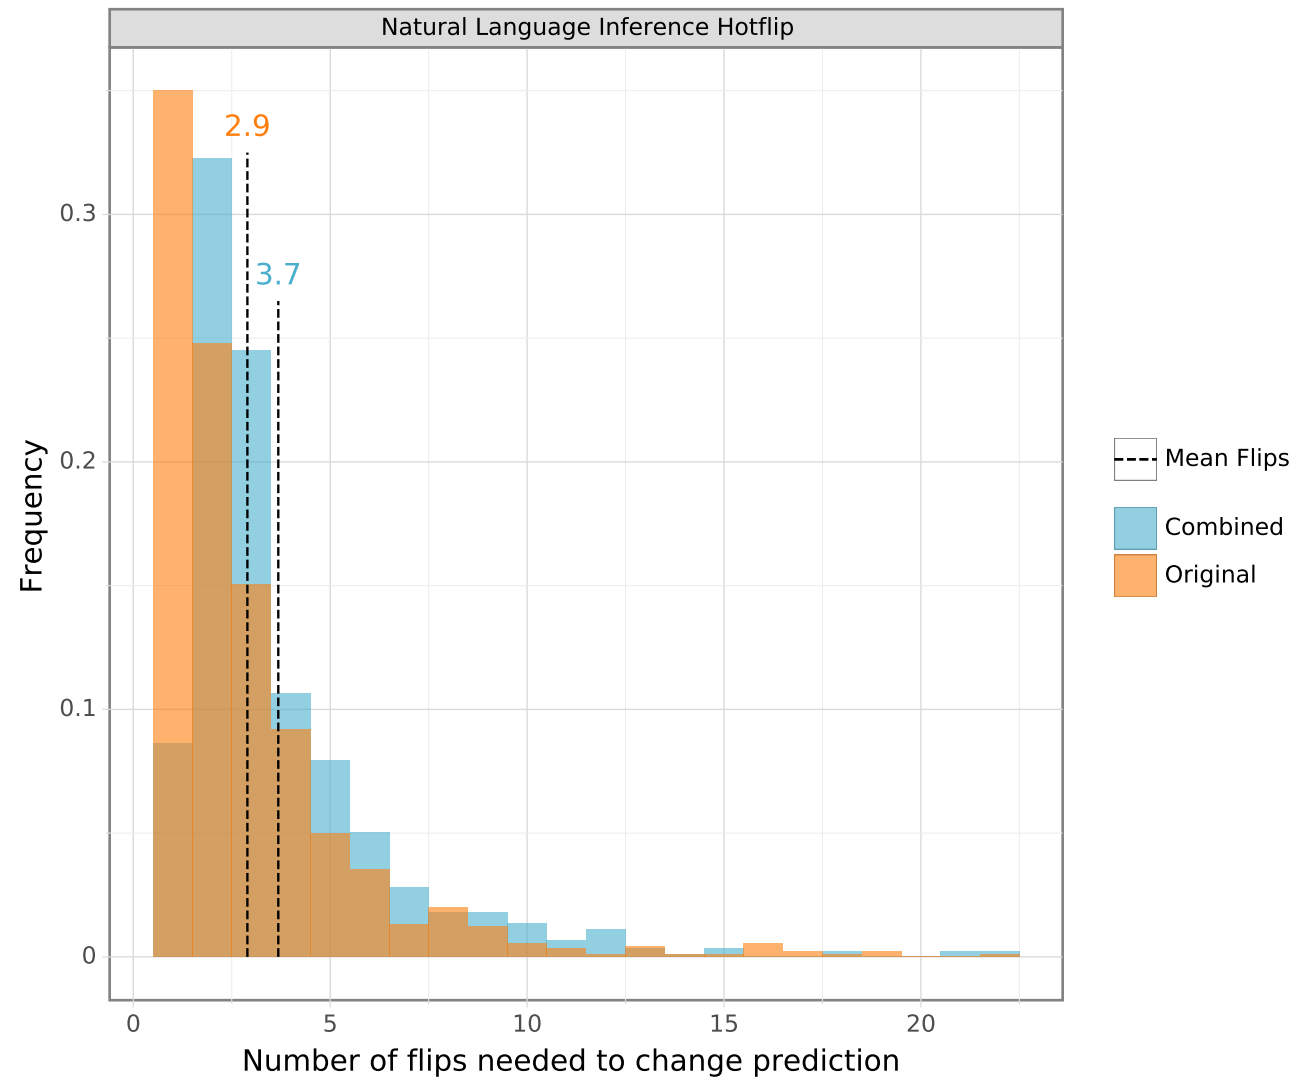

Supplement: OptionalSupplementaryMaterial [file 2020.findings-emnlp.24.OptionalSupplementaryMaterial.zip]

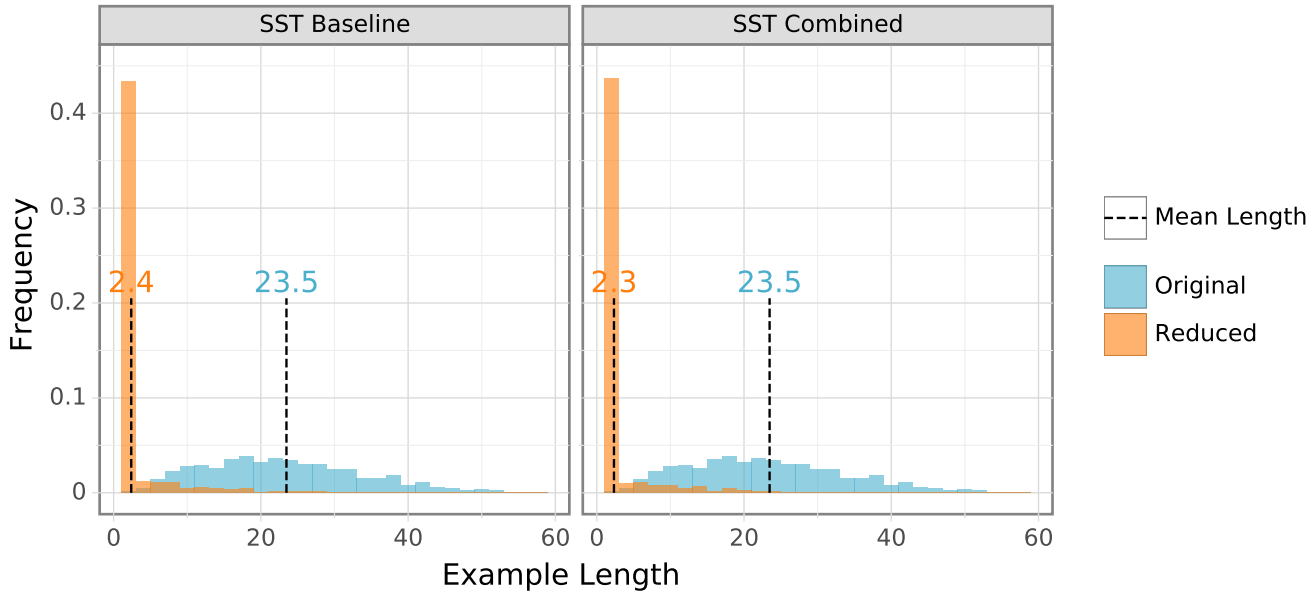

Supplement: OptionalSupplementaryMaterial [file 2020.findings-emnlp.24.OptionalSupplementaryMaterial.zip]

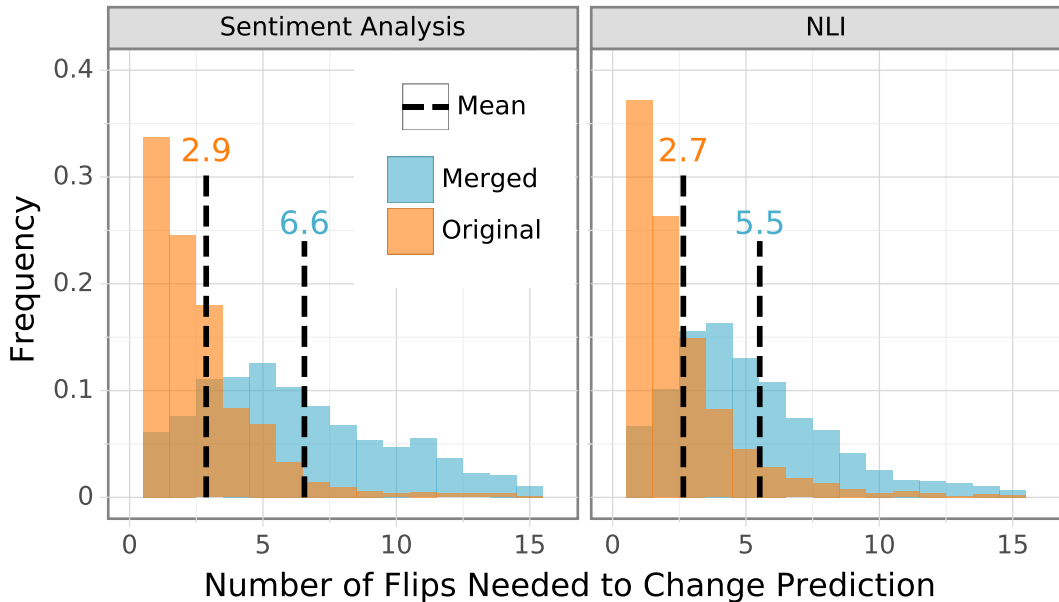

Supplement: OptionalSupplementaryMaterial [file 2020.findings-emnlp.24.OptionalSupplementaryMaterial.zip]

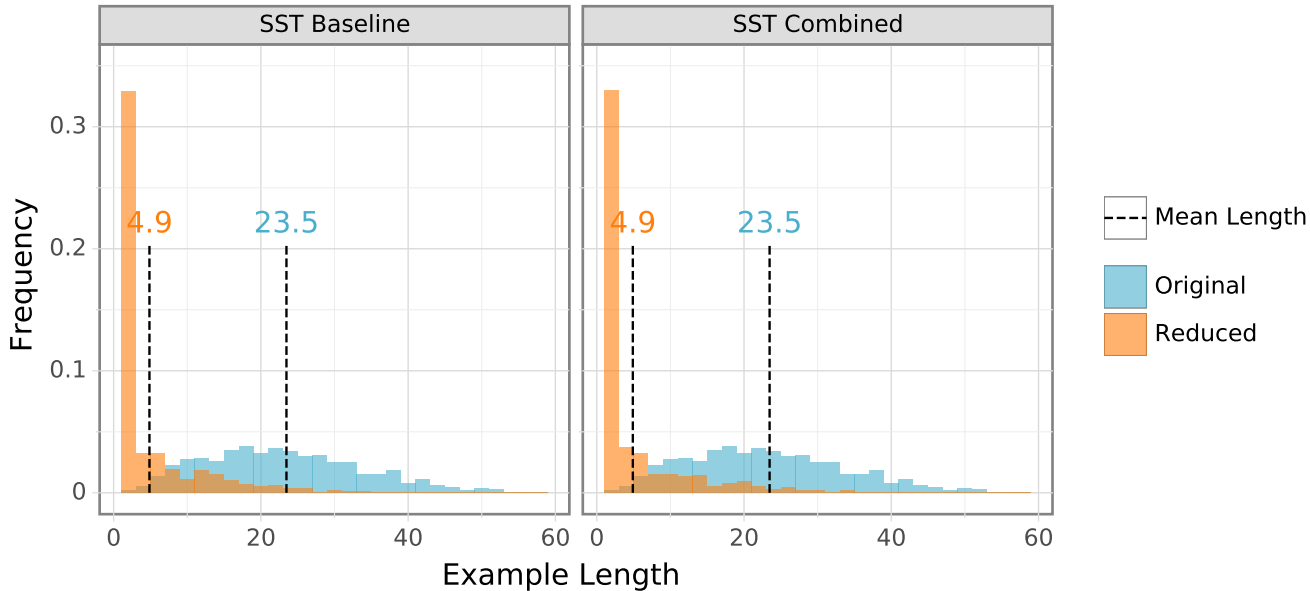

Supplement: OptionalSupplementaryMaterial [file 2020.findings-emnlp.24.OptionalSupplementaryMaterial.zip]

SNLI

Frequency

0.4

0.3

0.2

0.1

0

2.7

4.6

Mean Flips

Merged

Original

0

5

10

Number of Flips to Change Prediction

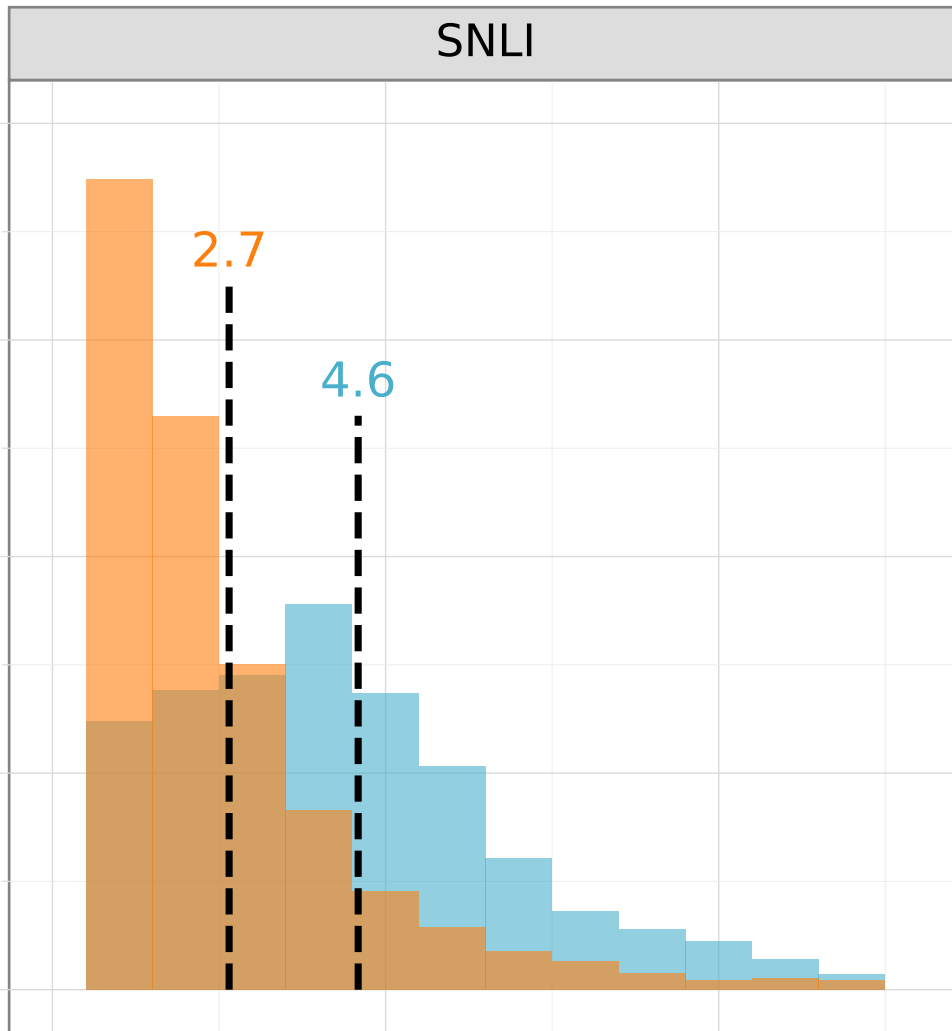

Supplement: OptionalSupplementaryMaterial [file 2020.findings-emnlp.24.OptionalSupplementaryMaterial.zip]

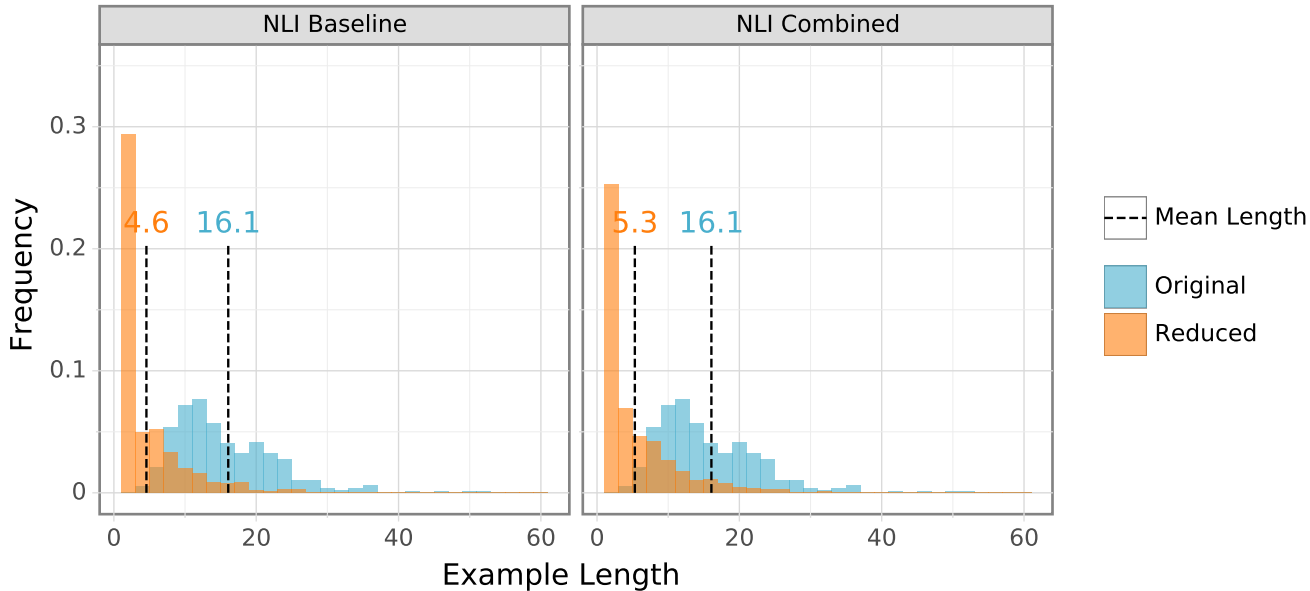

Supplement: OptionalSupplementaryMaterial [file 2020.findings-emnlp.24.OptionalSupplementaryMaterial.zip]

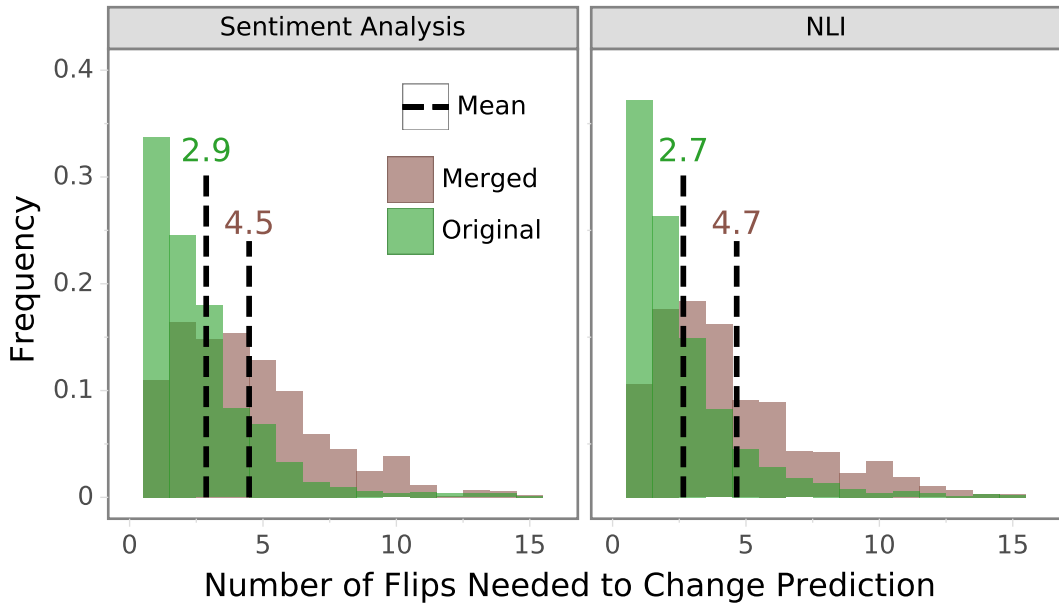

Supplement: OptionalSupplementaryMaterial [file 2020.findings-emnlp.24.OptionalSupplementaryMaterial.zip]

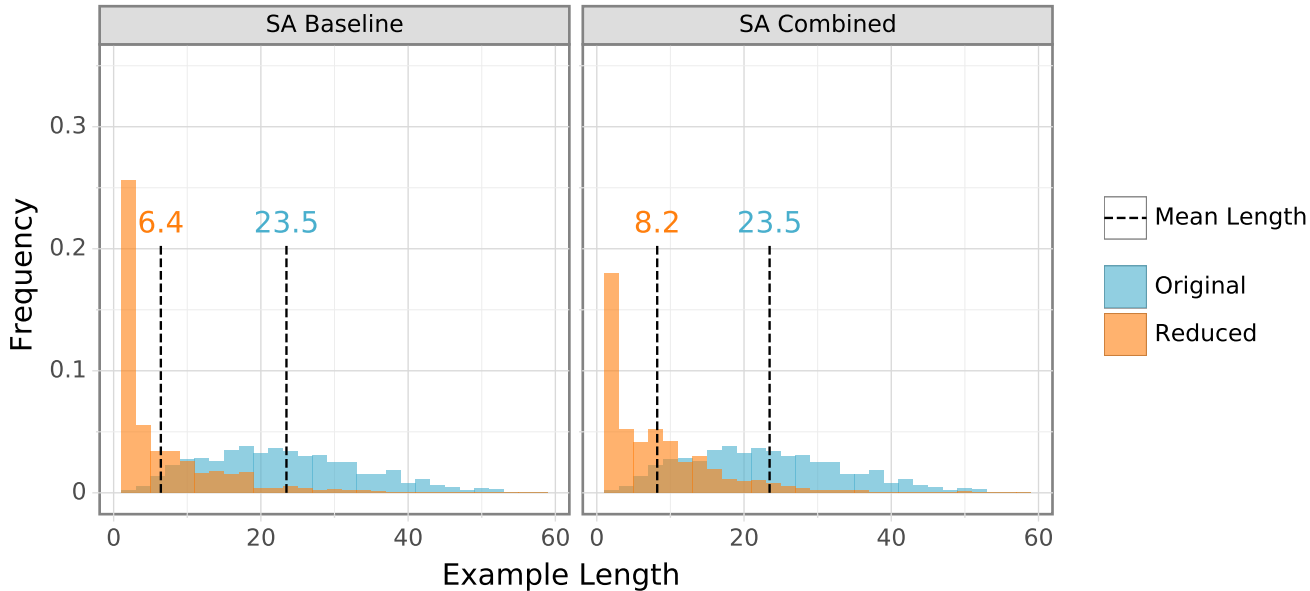

Supplement: OptionalSupplementaryMaterial [file 2020.findings-emnlp.24.OptionalSupplementaryMaterial.zip]

# Sentiment Analysis Hotflip

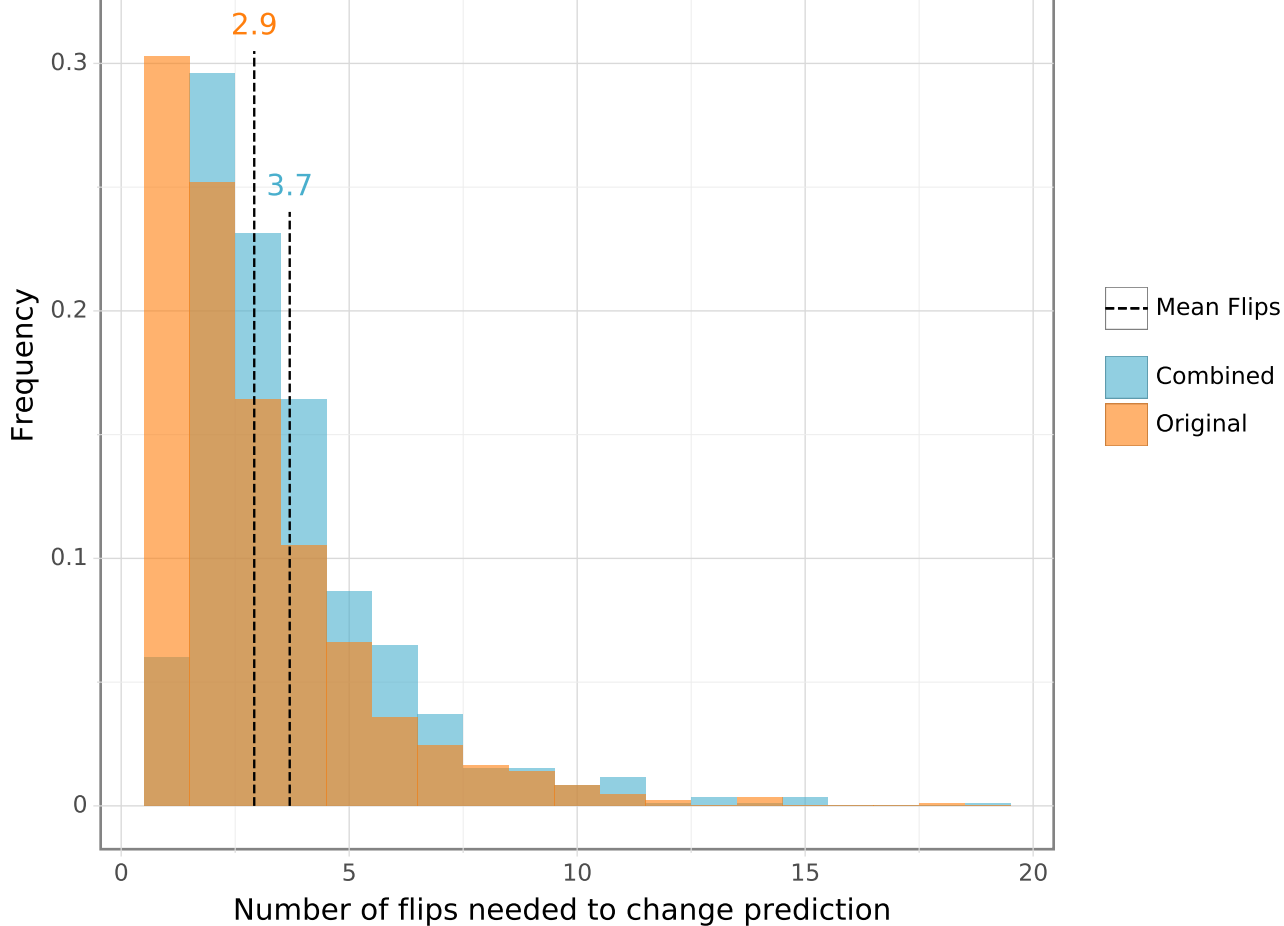

Supplement: OptionalSupplementaryMaterial [file 2020.findings-emnlp.24.OptionalSupplementaryMaterial.zip]

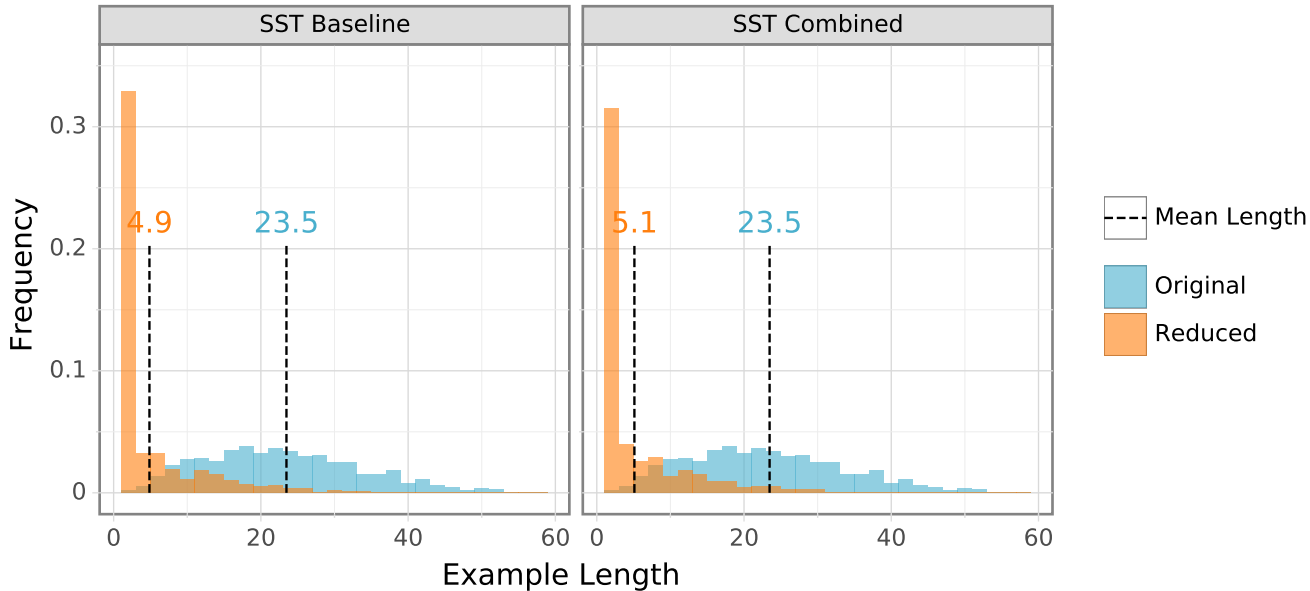

Supplement: OptionalSupplementaryMaterial [file 2020.findings-emnlp.24.OptionalSupplementaryMaterial.zip]
